# Supplementary material for: More coral, more fish? Contrasting snapshots from a remote Pacific atoll
Source: PeerJ. 2015 Jan 29;3:e745. doi: 10.7717/peerj.745 (PMC4314088; doi:10.7717/peerj.745)
Supplement: Table S1 — The numerator shows abundance in 1981, as reported by Bell & Galzin (1984); the denominator shows abundance in 2012, derived from the same surveying method (i.e., one 50-m transect) at the same sites. Zeros are omitted for clarity. Asterisks denote species considered to be reliant on live coral for shelter or food. [file peerj-03-745-s001.docx]

Table S1. Reef fish species, and their abundances (number of individuals per 250 m2), recorded at 13 sites in the lagoon of Mataiva Atoll, French Polynesia. The numerator shows abundance in 1981, as reported by Bell & Galzin (1984); the denominator shows abundance in 2012, derived from the same surveying method (i.e., one 50-m transect) at the same sites. Zeros are omitted for clarity. Asterisks denote species considered to be reliant on live coral for shelter or food.

Site

Taxon 1 2 3 4 5 6 7 8 9 10 11 12 13

**Synodontidae**

*Saurida gracilis* / / / / / / / / / / /1.5 / /

**Muraenidae**

*Gymnothorax buroensis* / / / / / / / / / /0.5 / / /

*G. javanicus* / / / / / /0.5 / /1 / / / 1/ /

**Holocentridae**

*Myripristis violacea** / / / / / / / / /0.5 / / / /

*Neoniphon argenteus* / / / / /2 / / /3.5 / /3 /2 /0.5 /

*N. sammara** / /1 / / / / / 1/ /1.5 / / / /

*Sargocentron spiniferum** / / / / / /1 / / /2.5 / /1.5 / /

**Serranidae**

*Cephalopholis argus** / / / / / / / / / / /0.5 2/1.5 /

*Epinephelus polyphekadion** / 1/ / / 1/ / / / / / / / /

**Apogonidae**

*Cheilodipterus macrodon* / /0.5 / / / / / /2 /0.5 /0.5 /1 / /

*C. quinquelineatus** 1/0.5 2/6.5 1/1.5 / 1/5 1/1.5 2/ 2/14.5 4/5 1/12.5 5/2 3/0.5 /0.5

*Pristiapogon exostigma* / / / / / / 1/ / / / / /1.5 /

*Ostorhinchus novemfasciatus* / / / / / / / / / / / 1/ /

**Carangidae**

*Caranx melampygus* / / / / / / / /0.5 1/ /0.5 / / /

**Lutjanidae**

*Lutjanus fulvus* / /1 1/1.5 2/3 3/1.5 12/1.5 /1.5 / 1/ 4/1.5 / 1/1 /

**Mullidae**

*Mulloidichthys flavolineatus* / 1/ / 1/ 6/1.5 /1 4/ /0.5 /3 / / / /17.5

*M. vanicolensis*  / / / / / /4 / / / / / / /

*Parupeneus insularis* / / / / / / / / / / / / 1/

*P. multifasciatus* / / / / / /0.5 / / /0.5 3/ /1 / 5/2.5

**Lethrinidae**

*Monotaxis grandoculis* / / / / / / / / / / / / /0.5

**Chaetodontidae**

*Chaetodon auriga** /1 1/ / /2.5 5/1 /1.5 /0.5 /5 1/5.5 /2.5 1/4.5 1/ 6/10

*C. bennetti** / / / / / / / /1 2/ /0.5 / / /

*C. citrinellus* / / / / / / / / / / / / 3/

*C. ephippium** /1.5 1/ 1/ /1.5 2/ 1/1 / 1/6 2/3.5 9/2.5 2/2.5 4/2.5 2/8

*C. lunula* / /0.5 / /3 1/ 1/ 1/ 1/ 2/9 / /1.5 / 10/

*C. lunulatus** /2.5 / /2 /7.5 / /1 /0.5 2/6.5 /11.5 16/3 4/7 /1.5 8/13

*C. semeion** / / / / / / / / / / /1 / /

*C. trifascialis** / / / / / / / / /1.5 / / / /

*C. ulietensis** / / / /1 1/ /0.5 / /1.5 /9 1/0.5 1/9 / 6/7.5

*C. unimaculatus** / / / / / / / / / / / / 1/

*C. vagabundus* / / / / / / / /1.5 / 1/ / / /12.5

**Pomacanthidae**

*Centropyge flavissima** /0.5 / / / / / / / / / 1/ / /

**Pomacentridae**

*Abudefduf septemfasciatus* / / / / /0.5 / / / / / / / /

*A. sexfasciatus*  / / /0.5 /0.5 /2 / /1 1/5 /1.5 /1 /0.5 /1 /

*Chromis margaritifer* / / / / / / / / / /0.5 / / /

*C. viridis** 7/2.5 15/1 /25 / / 27/72.5 56/ 27/135 92/ 30/6 24/0.5 69/103 /99

*Chrysiptera brownriggii* /1.5 / / /0.5 / / / / / / / 1/1.5 /

*Dascyllus aruanus** /38.5 / /68.5 /0.5 / 2/11.5 3/3 1/24.5 9/5.5 17/9.5 15/0.5 40/52.5 7/87.5

*D. flavicaudus*  / / / / / / / / / / / / /1

*Plectroglyphidodon* /0.5 / /1 / / / / /0.5 / / / / /

*phoenixensis**

*Pomacentrus coelestis* / / / / / 1/ 8/ 1/2 11/ / 11/ /3 /

*Stegastes nigricans** /66.5 / /42.5 / / / / / / / 3/0.5 1/28 15/1.5

**Labridae**

*Bodianus axillaris* / / / /0.5 / / / / / / / / /

*Bodianus* sp. / / / / / / / / / 1/ / / /

*Cheilinus trilobatus** /0.5 / / / / / / /0.5 / /0.5 / / 1/

*Cheilinus* sp. / / / / / / / / / / / 1/ /

*Coris aygula* / / / /1.5 / / / / / / / / /

*Coris gaimard*  / / / / 1/ / / / / / / / /

*Epibulus insidiator** / /0.5 / /3 / / /0.5 /4.5 /0.5 / /0.5 / /

*Gomphosus varius** / / / /5.5 / /0.5 / /2.5 / / /4 / 4/2.5

*Halichoeres hortulanus*  / / / / / / / /1.5 / / 1/0.5 20/ 5/

*H. marginatus** / / / / / / / 1/ / / / / /

*H. trimaculatus* /6 / /12.5 /1 /1.5 /0.5 / /2.5 /0.5 /1.5 /1 /14 /10

*Halichoeres* sp. / / / / / / / / / / / 3/ /

*Labroides dimidiatus** / / / / / / / / / / / /1 1/3

*Pseudocheilinus octotaenia* /0.5 / / / / / / / / / / 1/ 1/

*Stethojulis bandanensis* /0.5 / / /1 / / /0.5 /0.5 / /1 /2 /0.5 1/1.5

*Thalassoma amblycephalum* / / /2 /0.5 / / / /1.5 / / /0.5 3/11 1/

*T. hardwicke* /3.5 / /4.5 /8.5 /4.5 /2.5 /1.5 /13 1/9 2/5 2/20.5 3/2 5/15

*T. quinquevittatum* /1 / / /8.5 / /3 /2 /4.5 /0.5 /1 4/12 / 2/1.5

*Wetmorella* sp. / / / / / / / / / / / 1/ /

Unidentified labrid / / / / / / / / / / / / 1/

**Scaridae**

*Chlorurus sordidus* /28.5 /34 /40.5 /119 5/11 /25 5/20 2/75 1/76 65/57.5 9/93.5 7/13.5 34/70.5

*Hipposcarus longiceps* / / / / 2/ / /0.5 / /1 / / / 3/

*Scarus ghobban* / / / / 2/ 1/ / / / 2/ / / 2/

*S. oviceps* /0.5 / / / / / / / / 2/ /0.5 / /

*Scarus* sp. 1/4.5 1/2 2/6 1/14 24/1.5 /1 1/1 8/14.5 4/2.5 /6.5 11/2 53/4 6/12.5

**Acanthuridae**

*Acanthurus triostegus* /8.5 /0.5 1/3.5 1/38 5/8 /5.5 /10 1/26 2/8 14/11 15/4 6/4 20/3

*Ctenochaetus striatus* /0.5 / / /0.5 / / / /2 / 1/ /1 /3 11/

*Zebrasoma scopas** / / / /0.5 / / / / /0.5 / / / /

*Z. velifer* / / / /0.5 3/ /0.5 / /3 /2.5 2/ 1/ / 4/

**Gobiidae**

*Amblygobius nocturnus* 4/1.5 2/1 5/ 1/ / / 2/ /1 / / 1/0.5 / /0.5

*A. phalaena* 4/5.5 11/5 14/9 3/5 2/16 4/4.5 9/4.5 16/12 13/5.5 1/23 35/11 13/4 8/8

*Asterropteryx semipunctata* / / / / / / / / 1/ / / 7/ 20/

*Ctenogobiops feroculus* /1.5 /1.5 / /1.5 / /0.5 /1.5 / /1 /9.5 /1.5 / /

Eviota spp. / /1 /1.5 /0.5 /6.5 /2.5 /0.5 / / /2.5 / / /

*Gnatholepis anjerensis* / / / / / / / / / / / /1 /

*Valenciennea strigata* / / / / / / / / / /1 / / /

*Unidentified goby* /1 /1.5 / /0.5 / / /1 /2.5 / /3.5 / /10.5 /5.5

**Blenniidae**

*Blenniella periophthalmus* / / / / / / / / / / / 1/1 /

*Ecsenius* sp. / /1.5 / /0.5 /0.5 /0.5 /0.5 /0.5 / / / /0.5 /0.5

**Bothidae**

*Bothus mancus* / / / / / / 1/ / / / / / /

**Balistidae**

*Rhinecanthus aculeatus* / / / / / / / / / / 1/ 1/ 1/

**Ephippidae**

*Platax* sp. / / / / / / / / /0.5 /2 / / /

**Tetraodontidae**

*Canthigaster bennetti* / / / / / / / / / / / 1/ 4/

*C. solandri* / / / 0/1 1/ 1/1 /1.5 / 1/1 / 1/1 1/ /6

**Ostraciidae**

*Ostracion cubicus** / / / / / / / / / / 1/ / /
